# Supplementary material for: Individualized Angiotensin‐Converting Enzyme (ACE)‐Inhibitor Therapy in Stable Coronary Artery Disease Based on Clinical and Pharmacogenetic Determinants: The PERindopril GENEtic (PERGENE) Risk Model
Source: PubMed Central journal article supplement — J Am Heart Assoc. 2016 Mar 28;5(3):e002688. doi: 10.1161/JAHA.115.002688 (PMC4943245; doi:10.1161/jaha.115.002688), 2016-03-28
Supplement: JAH3-5-e002688-s001.pdf [file JAH3-5-e002688-s001.pdf]

## SUPPLEMENTAL MATERIAL

**Table S1.** The regression coefficients from the final multivariable model that were converted to the clinical risk score.

| <b>Variable</b>                     | <b>Regression coefficients (<math>\beta</math>)</b> |
|-------------------------------------|-----------------------------------------------------|
| Age (years)                         | 0.023                                               |
| Systolic bloodpressure (mmHg)       | 0.005                                               |
| Creatinine clearance (ml/min)       | -0.004                                              |
| Total cholesterol (mmol/L)          | 0.125                                               |
| Previous stroke or PAD              | 0.552                                               |
| Male gender                         | 0.447                                               |
| Obesity (BMI>30 kg/m <sup>2</sup> ) | 0.377                                               |
| Current smoking                     | 0.462                                               |
| Symptomatic CAD                     | 0.430                                               |
| Diabetes mellitus                   | 0.449                                               |
| Previous MI                         | 0.422                                               |
| Family history of CAD               | 0.086                                               |
| Previous revascularisation          | -0.168                                              |

For the continuous variables (age, systolic bloodpressure, creatinin clearance and total cholesterol) the regression coefficients are described per unit of increase of that particular independent variable.

**Table S2. Pharmacogenetic risk score on the basis of allele distribution**

| Angiotensin-II type I-receptor |        | Bradykinin type I receptor |                                          |
|--------------------------------|--------|----------------------------|------------------------------------------|
| SNP: Rs275651                  | Rs5182 | Rs12050217                 | <b>Pharmacogenetic Risk Score points</b> |
| AA                             | TT     | AA                         | <b>0</b>                                 |
| AT                             | CT     | AG                         | <b>1</b>                                 |
| TT                             | CC     | GG                         | <b>2</b>                                 |

The range of pharmacogenetic risk scores = 0-6. Risk alleles for decreased benefit of perindopril treatment were T, C, and G for Rs275651, Rs5182 and Rs12050217 respectively. Points for each of the three separate SNPs need to be added to each other. E.g. a patient with AA, CC, AG (for Rs275651, Rs5182 and Rs12050217 respectively) has an individual pharmacogenetic risk score of  $0+2+1=3$

## **EUROPA / PERGENE Investigators**

**Austria**—H Drexel, G Gombotz, W Kleit.

**Belgium**—D Duprez, G H Heyndrickx, V Legrand, P Materne, W Van Mieghem.

**Czech Republic**—P Bocek, M Branny, M Cech, J Charouzek, J Drazka, L Fabik, J Florian, L Francek, L Groch, P Havranek, J Hradec, P Jansky, R Jirmar, I Jokl, H Krejcova, M Kvasnak, T Maratka, G Marcinek, J Moravcova, P Nedbal, K Peterka, J Povolny, H Rosolova, B Semrad, K Sochor, R Spacek, J Spinar, R Stipal, K Stuchlik, M Sulda, J Ulman, A Vaclavicek, P Vojtisek.

**Denmark**—H Bjerregaard-Andersen, P Hildebrandt, K Kristensen, J K Madsen, J Markenvard, J Meibom, A Norgaard, M Scheibel.

**Estonia**—J Eha, A Leht, R Teesalu, V Vahula.

**Finland**—A Itkonen, J Juvonen, J Karmakoski, E Kilkki, E Koskela, J Melin, M S Nieminen, R Savola, T Terho, L M Voipio-Pulkki.

**France**—F Apffel, P Attali, C Barjhoux, B Baron, J P Bassand, Y Berthier, P Dambrine, E Decoux, P Deshayes, R Fouche, M Genest, S Godard, J P Guillot, G Hanania, P Khatrar, F Leroy, J Mansourati, R Piquemal, J C Quiret, P Raynaud, D Rondepierre, J L Roynard, S Sudhibhasilp, E Van Belle.

**Germany**—A Bilbal, B Lauer, G Rettig-Sturmer, R Riessen, W Rutsch, U Sechtem, H A Sigel, R Simon, C Von Schacky, B R Winkelmann.

**Greece**—C Avgeropoulou, S Christakos, S Feggos, S Floros, I Fotiadis, I Goudevenos, D Kardara, C Karidis, N Koliopoulos, D Kremastinos, I Lekakis, A Manolis, V Pyrgakis, C Papanikolaou, E Papasteriadis, P Skoufas, A Stravrati, A Stavridis, S Syribeis, P Vardas, I Vassiliadis, V Voudris, S Zobelos.

**Hungary**—I Berenyi, I Edes, A Janosi, E Kalo, P Karpati, S Kornel, I Pap, G Polak, I Reiber, M Rusznak, J Tarjan, S Timar, K Toth.

**Ireland**—J Barton, P Crean, K Daly, P Kearney, T B Meany, D Mulcahy, P Quigley.

**Italy**—R Antolini, P Azzolini, E Bellone, A Branzi, C Brunelli, E Capponi, A Capucci, M Casaccia, E Cecchetti, V Ceci, L Celegon, A Colombo, G Corsini, F Cucchini, S Dalla Volta, R De Caterina, I De Luca, S De Servi, M Di Donato, U Di Giacomo, G Di Pasquale, C Fiorentini, O Gaddi, M Giannetto, P Giannuzzi, A Giordano, E Giovannini, M Guarnierio, A Iacono, G Inama, R Leghissa, R Lorusso, G Marinoni, M Marzilli, F Mauri, G M Mosele, S Papi, G Pela, G Pettinati, M R Polimeni, F Portaluppi, C Proto, E Renaldini, S Riva, M Sanguinetti, M Santini, S Severi, G Sinagra, L Tantalò, L Tavazzi, S F Vajola, M Volterrani.

**Latvia**—B Ansmite, E Gailiss, A Gersamija, U Kalnins, M A Ozolina. **Lithuania**—A Baubiniene, E Berukstis, L Grigoniene, A Kibarskis, A Kirkutis, R Marcinkus, I Milvidaite, D Vasiliauskas.

**Netherlands**—J C A Aalders, W A J Bruggeling, P J De Feyter, M J De Leeuw, D E P De Waard, G J De Weerd, C De Zwaan, R Dijkgraaf, H T Droste, M P Freericks, A W Hagoort-Kok, F Hillebrand, W T J Jap, G M Jochemsen, F Kiemeney, P J P Kuijjer, H F J Mannaerts, J J Piek, J P M Saelman, F D Slob, W C G Smits, M J Suttorp, T B Tan, G J Van Beek, L F M Van Den Merkhof, R Van Der Heyden, M W J Van Hessen, R A M Van Langeveld, P R Van Nierop, F J W Van Rey, M J Van Straalen, J Vos, H A Werner, J J C Westendorp.

**Norway**—J Erikssen.

**Poland**—P Achremczyk, J Adamus, J Baska, H Bolinska-Soltysiak, R Bubinski, L Ceremuzyński, A Cieslinski, D Dariusz, P Drozdowski, J S Dubiel, M Galewicz, B Halawa, M Janion, K Jaworska, I Kaszewska, A Kleinrok, Z Kornacewicz-Jach, W Krawczyk, R Krynicki, M Krzciuk, M Krzeminska-Pakula, J Kuch, J Kuzniar, D Liszewska-Pfejfer, K Loboz-Grudzien, W Musial, G Opolski, S Pasyk, W Piwowarska, G Pulkowski, W Ruzyllo, A Rynkiewicz, W Sinkiewicz, M Skura, S Slowinski, W Smielak-Korombel, R Targonski, W Templin, M Tendera, W Tracz, M Trusz-Gluza, J Wodniecki, M Zalewski, E Zinka.

**Portugal**—M Carrageta, J Coelho Gil, R Ferreira, A Leitao Marques, C M Santos Andrade, R Seabra-Gomes.

**Slovakia**—V Bada, M Belicova, A Dukat, G Kaliska, G Kamensky, K Micko, Z Mikes, M Palinsky, D Pella, B Renker, I Rieicansky, P Sefara, G Sojka, P Sulej, M Szakacs.

**Spain**—J M Aguirre Salcedo, N Alonso Orcajo, P Ancillo Garcia, J M Auge Sanpera, J Ayuela Azcarate, J L Bardaji Mayor, V Bertomeu Martinez, J L Blanco Coronado, F Bosa Ojeda, R Bros Caimari, J Bruguera Cortada, J Caparros Valderrama, A Del Rio Ligorit, J S Espinosa Caliani, F Fernandez Aviles, J J Garcia Guerrero, D Garcia Lopez, E Gonzalez Cocina, C Guallar Urena, L Jodar Lorente, V Lopez Garcia-Aranda, C Macaya De Miguel, J Maroto Montero, P Martinez Romero, I Mate Benito, F Navarro Lopez, F Noriega Peiro, J Olague De Ros, J Orellana Mas, M A Paz Bermejo, L J Placer Peralta, L Rodriguez Padial, A Salvador Sanz, J Segui Bonnin, E Simarro Martin, F Valles Belsue.

**Sweden**—S Ekdahl, L Erhardt, L Forslund, H Ohlin.

**Türkey**—E Acarturk, D Guzelsoy, A Oto, O Özsaruhan, C Turkoglu.

**UK**—A A J Adgey, A Ahsan, M Al-Khafaji, S G Ball, J Birkhead, N Boon, M Brack, A Bridges, M Buchalter, B Calder, R A Cooke, L Corr, R Cowell, N P Curzen, C Davidson, J Davies, M A De Belder, L Dhiya, J C Doig, I N Findlay, K M Fox, C M Francis, J M Glancy, T W Greenwood, P Groves, A S Hall, G Hamilton, I Haq, R Hillman, W Hubbard, I Hudson, I Hutton, C Ilsley, M Innes, M James, K Jennings, G Johnston, C J H Jones, M Joy, P Keeling, J Kooner, C Lawson, R D Levy, G Lip, B Mclachlan, H E Montgomery, C A Morley, D L Murdoch, R Muthusamy, G D G Oakley, W Penny, R Percival, J Purvis, M P Pye, D Ramsdale, D H Roberts, A Rozkovec, A M Salmassi, S Saltissi, S Sardar, L M Shapiro, P M Schofield, J Stephens, C Shakespeare, S Srivastava, J W Swan, G Tildesley, C Travill, P R Wilkinson.
